# Supplementary material
Source: PubMed Central journal article supplement (PMC5459402)
Supplement: NIHMS855278-supplement-Appendix.pdf [file NIHMS855278-supplement-Appendix.pdf]

## Supplementary Appendix

### Mortality, Hospitalizations, and Expenditures for the Medicare Population age 65 and Older, 1999-2013

#### Table of Contents

|                                                                                                                                                                                                                                   |              |
|-----------------------------------------------------------------------------------------------------------------------------------------------------------------------------------------------------------------------------------|--------------|
| <b>List of Investigators:</b> .....                                                                                                                                                                                               | <b>3</b>     |
| <b>Supplemental Figures</b> .....                                                                                                                                                                                                 | <b>4-11</b>  |
| <b>Supplementary Figure Legends</b> .....                                                                                                                                                                                         | <b>4-6</b>   |
| <b>Figure S1.</b> Adjusted Annual Changes in Mortality Rates by Age, Sex and Race in the Fee-for-Service Population .....                                                                                                         | <b>7</b>     |
| <b>Figure S2.</b> Histogram Depicting Risk-Standardized Mortality Rates by U.S. Counties or County Equivalents in 1999 and 2013 in the Fee-for-Service Population.....                                                            | <b>8</b>     |
| <b>Figure S3.</b> Adjusted Annual Changes in Hospitalization Rates by Age, Sex and Race in the Fee-for-Service Population .....                                                                                                   | <b>9</b>     |
| <b>Figure S4.</b> Histogram Depicting Risk-Standardized Hospitalization Rates in the Fee-for-Service Population by U.S. Counties or County Equivalents in 1999 and 2013 .....                                                     | <b>10</b>    |
| <b>Figure S5.</b> Top 10 Principal Discharge Diagnoses with Corresponding International Classification of Diseases (9 <sup>th</sup> Edition) Codes for Medicare Fee-for-Service Beneficiaries Hospitalized in 1999 and 2013 ..... | <b>11</b>    |
| <b>Supplementary Tables</b> .....                                                                                                                                                                                                 | <b>12-37</b> |
| <b>Table S1.</b> Medicare Population 1999, 2006, and 2013 – Demographic Features and Comorbidities by Age .....                                                                                                                   | <b>12-16</b> |

**Table S2.** Medicare Population 1999, 2006, and 2013 – Demographic Features and Comorbidities by Race-Sex Groups..... **17-22**

**Table S3.** Medicare Population 1999, 2006, and 2013 – Hospitalizations and Outcomes by Age ..... **23-28**

**Table S4.** Medicare Population 1999, 2006, and 2013 – Hospitalizations and Outcomes by Race-Sex groups ..... **29-37**

## **List of Investigators**

Harlan M. Krumholz, MD, SM

Sudhakar V. Nuti, BA

Nicholas S. Downing, MD

Sharon-Lise T. Normand, PhD

Yun Wang, PhD

## Supplemental Figures

### Supplementary Figure Legends

**Figure S1.** Adjusted Relative Annual Declines in Mortality Rates by Age, Sex and Race in the Fee-for-Service Population, 1999-2013.

The adjusted relative annual decline was calculated based on the incidence rate ratio for the time variable that was estimated from a mixed effects model with a Poisson link function. It represents the age-sex-race-adjusted relative annual decline in an outcome, given the other variables (i.e., age, sex, and race) are held constant in the model.

**Figure S2.** Histogram Depicting Risk-Standardized Mortality Rates (%) by U.S. Counties in 1999 and 2013 in the Fee-for-Service Population.

The blue bars and line represent data from 1999, while the red bars and line represent data from 2013. Each bar represents 0.1% of the risk-standardized mortality rate. Curves were fitted by a normal distribution function. There were a total of 27,552,139 Medicare fee-for-service beneficiaries aged 65 years or older across 3,275 counties or county equivalents in 1999 and a total of 30,148,234 Medicare fee-for-service beneficiaries aged 65 years or older across 3,280 counties or county equivalents in 2013. Data from Puerto Rico were included to estimate the national rate but were not included in the maps. For Puerto Rico, the risk-standardized mortality rate decreased from 4.97% (95% CI 4.91 to 5.04) in 1999 to 3.64 (95% CI 3.55 to 3.73) in 2013.

**Figure S3.** Adjusted Relative Annual Declines in Hospitalization Rates by Age, Sex and Race in the Fee-for-Service Population.

The adjusted relative annual decline was calculated based on the incidence rate ratio for the time variable that was estimated from a mixed effects model with a Poisson link function. It represents the age-sex-race-adjusted relative annual decline in an outcome, given the other variables (i.e., age, sex, and race) are held constant in the model.

**Figure S4.** Histogram Depicting Risk-Standardized Hospitalization Rates per 100,000 Person-years in the Fee-for-Service Population by U.S. Counties in 1999 and 2013.

The blue bars and line represent data from 1999, while the red bars and line represent data from 2013. Each bar represents 2,000 per 100,000 person-years risk-standardized hospitalizations. Curves were fitted by a normal distribution function. There were a total of 26,147,690 person-years of Medicare fee-for-service beneficiaries aged 65 years or older across 3,275 counties or county equivalents in 1999 and a total of 28,834,706 person-years of Medicare fee-for-service beneficiaries aged 65 years or older across 3,280 counties or county equivalents in 2013. Puerto Rico data was included to estimate the national rate but did not include in the maps. For Puerto Rico, the risk-standardized hospitalization rate per 100,000 person-years decreased from 29,038 (95% CI 27,891 to 30,184) in 1999 to 17,432 (95% CI 16,775 to 18,089) in 2013.

**Figure S5.** Top 10 Principal Discharge Diagnoses with Corresponding International Classification of Diseases (9<sup>th</sup> Edition) Codes for Medicare Fee-for-Service Beneficiaries Hospitalized in 1999 and 2013.

The color of the lines connecting the top 10 diagnoses in 1999 and 2013 indicate directional changes in the ordinal rank of specific diagnoses: green indicates rank has decreased (e.g., from 9<sup>th</sup> to 6<sup>th</sup>; therefore, more common), red indicates an increase, and black no change.

**Figure S6.** Major Discharge Disposition by Year, 1999-2013.

From top to bottom, pink represents transferred out, light blue represents discharge to rehabilitation, green represents discharge to others, light purple represents discharge to nursing facility, brown represents discharge to hospice/long-term care, green represents discharge to home with care services, red represents discharge to home, and dark purple represents expiration.

**Figure S1.** Adjusted Relative Annual Declines in Mortality Rates by Age, Sex and Race in the Fee-for-Service Population, 1999-2013

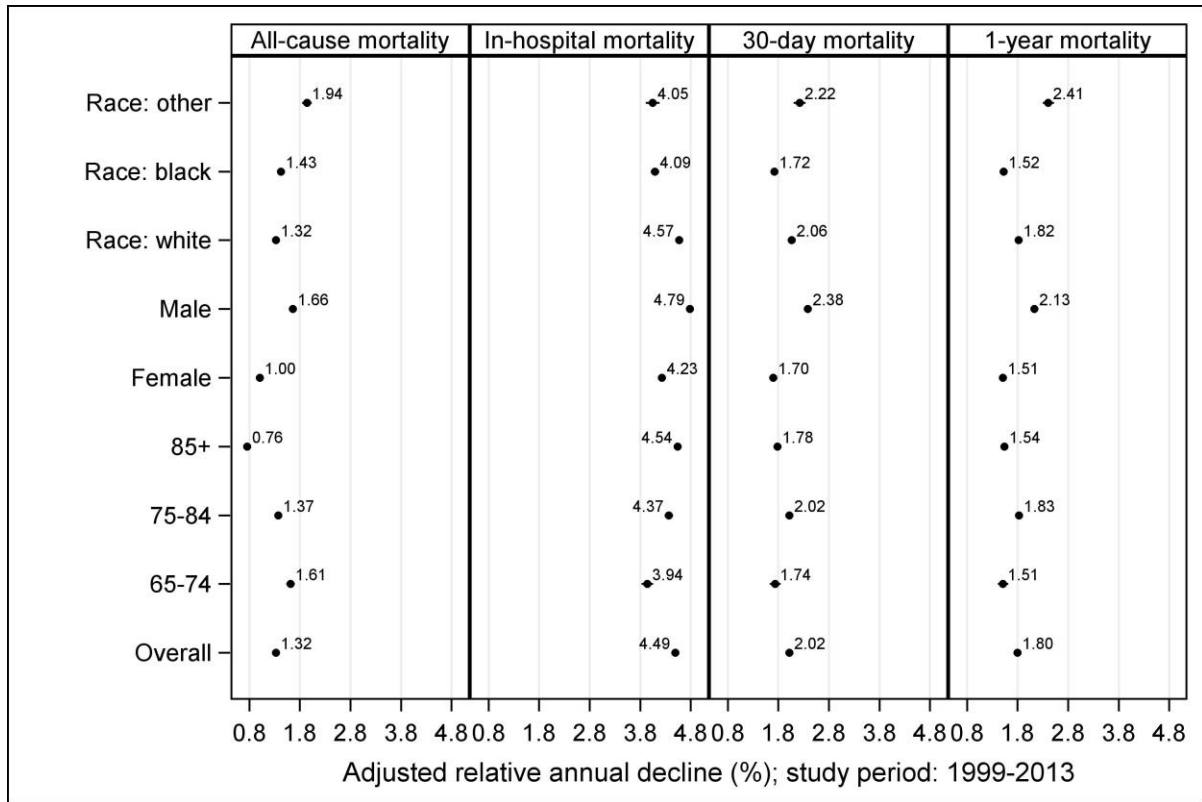

**Figure S2.** Histogram Depicting Risk-Standardized Mortality Rates (%) by U.S. Counties or County Equivalents in 1999 and 2013 in the Fee-for-Service Population

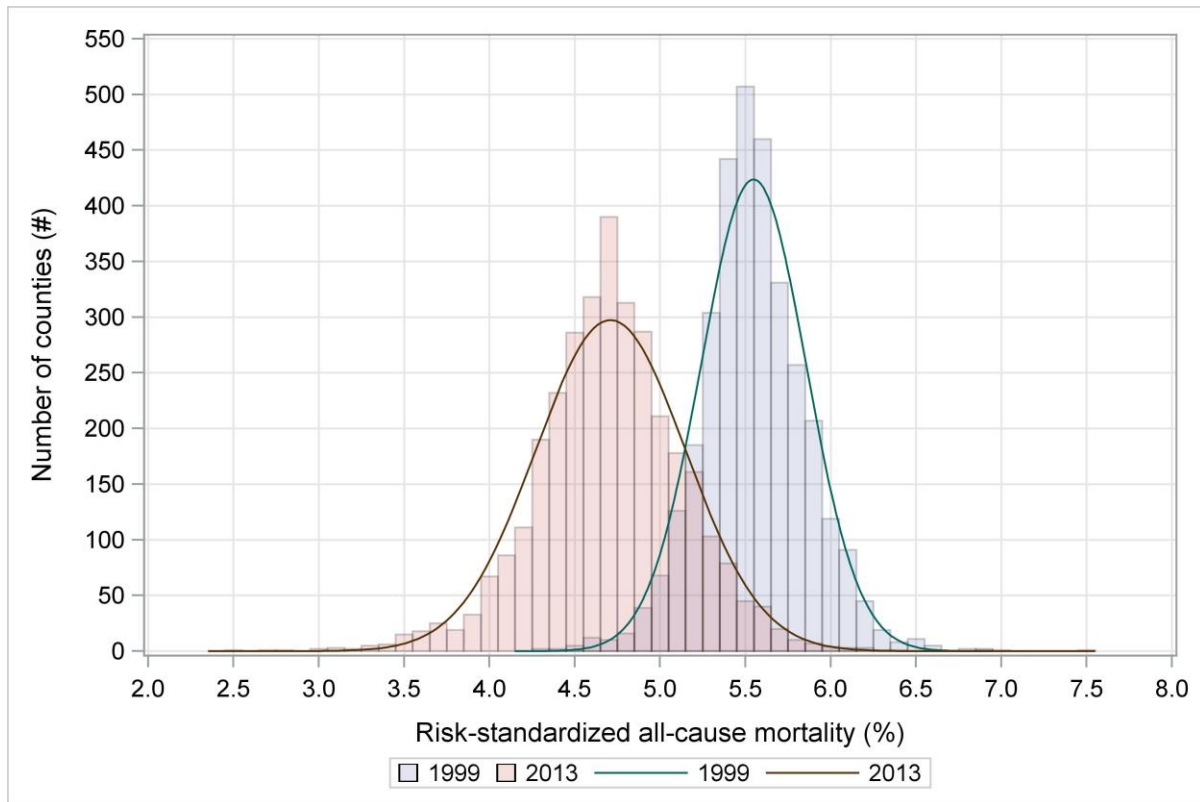



**Figure S3.** Adjusted Relative Annual Declines in Hospitalization Rates by Age, Sex and Race in the Fee-for-Service Population

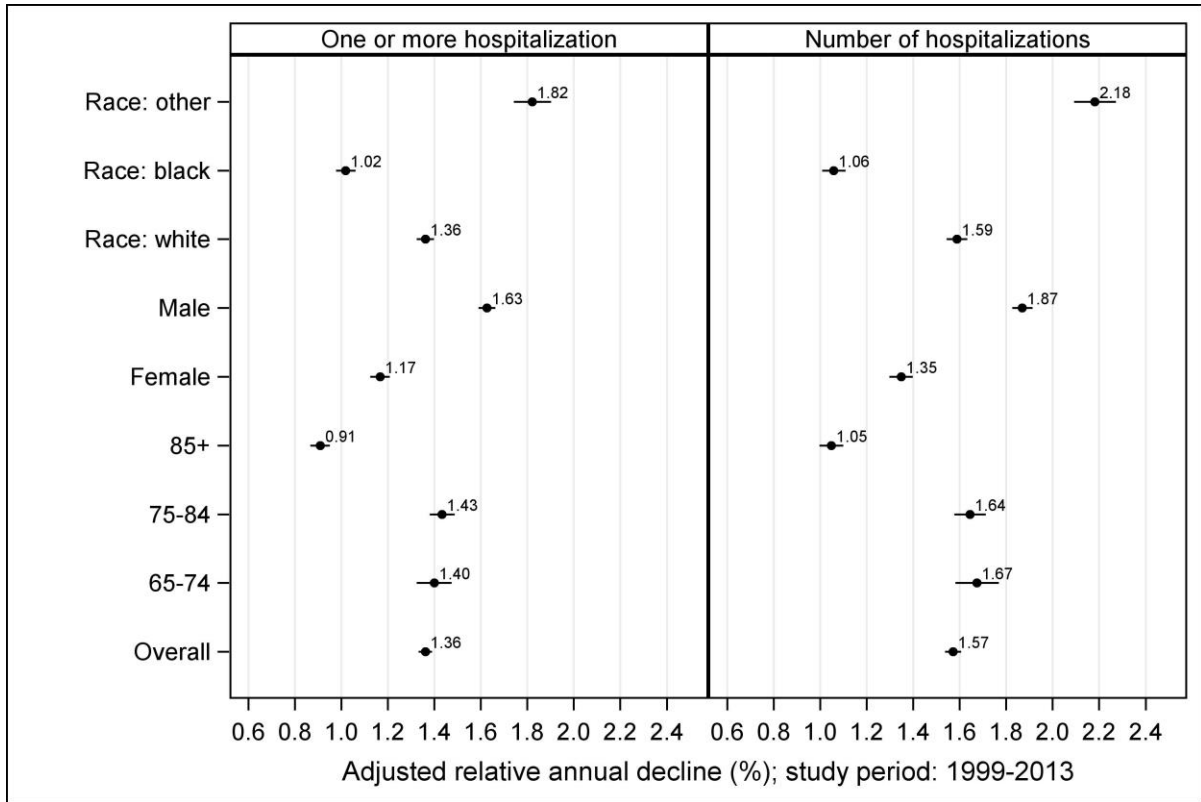

**Figure S4.** Histogram Depicting Risk-Standardized Hospitalization Rates per 100,000 person-years in the Fee-for-Service Population by U.S. Counties or County Equivalents in 1999 and 2013

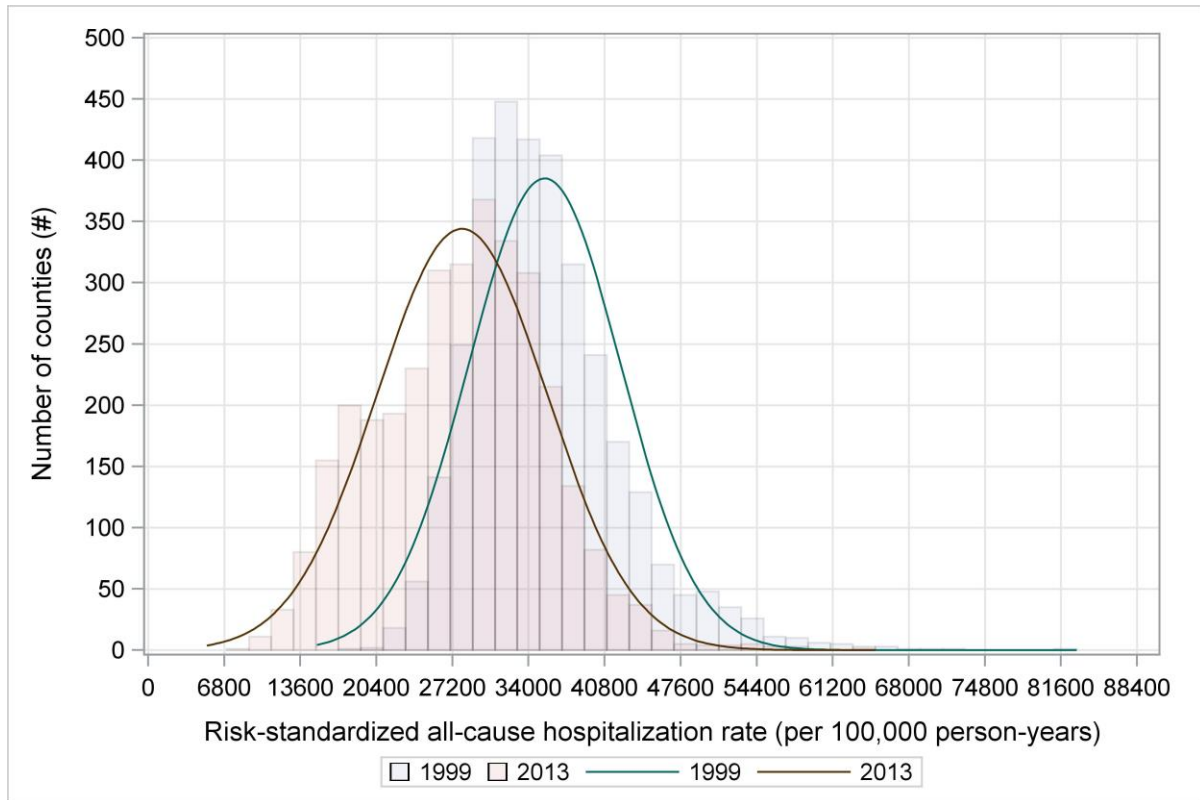

**Figure S5.** Top 10 Principal Discharge Diagnoses with Corresponding International Classification of Diseases (9<sup>th</sup> edition) Codes for Medicare Fee-for-Service Beneficiaries Hospitalized in 1999 and 2013.

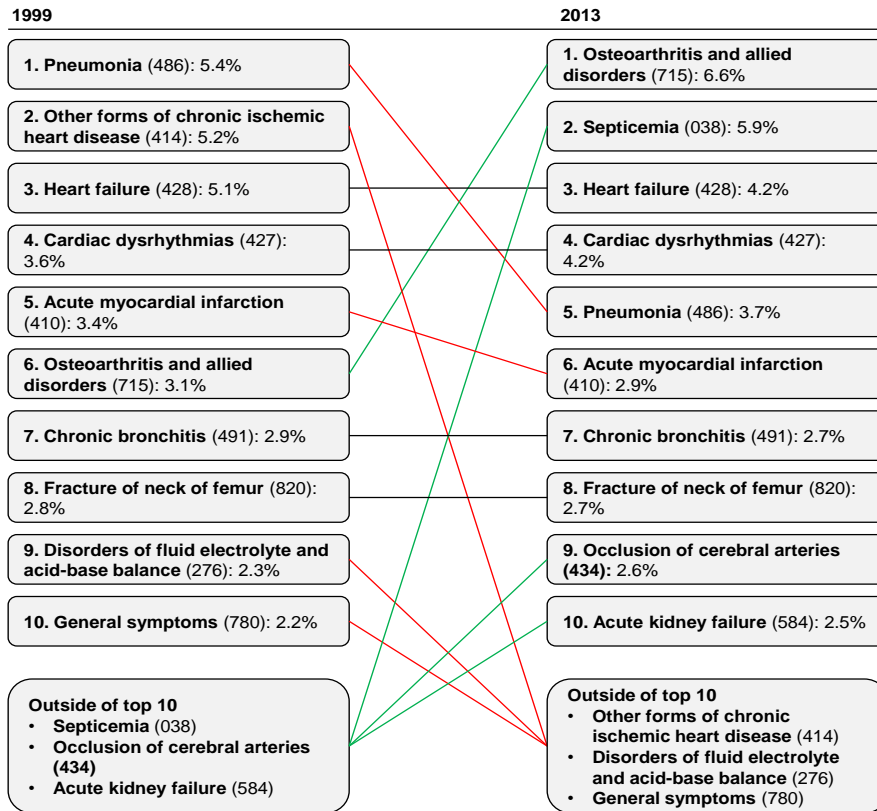

**Supplementary Tables**

**Table S1.** Medicare Fee-for-Service Population 1999, 2006, and 2013 – Demographic Features and Comorbidities by Age Groups.

| Category                                   | Age (years) | 1999       | 2006       | 2013       |
|--------------------------------------------|-------------|------------|------------|------------|
| <b>Medicare Fee-for-Service population</b> |             |            |            |            |
| Total number of beneficiaries              |             |            |            |            |
|                                            | 65-74       | 14,322,275 | 15,347,057 | 16,905,170 |
|                                            | 75-84       | 9,670,813  | 10,404,462 | 8,922,528  |
|                                            | ≥85         | 3,559,051  | 4,037,175  | 4,320,536  |
| Person-years of Medicare enrollment        |             |            |            |            |
|                                            | 65-74       | 13,828,895 | 14,672,246 | 16,418,718 |
|                                            | 75-84       | 9,157,599  | 9,796,481  | 8,528,376  |
|                                            | ≥85         | 3,161,196  | 3,594,076  | 3,887,612  |
| <b>Demographics</b>                        |             |            |            |            |
| Mean age, year, standard deviation         |             |            |            |            |
|                                            | 65-74       | 69.4 (2.9) | 69.1 (2.9) | 68.8 (2.9) |
|                                            | 75-84       | 78.9 (2.8) | 79.1 (2.8) | 79.1 (2.9) |
|                                            | ≥85         | 89.1 (3.7) | 89.1 (3.7) | 89.2 (3.7) |
| Female, %                                  |             |            |            |            |
|                                            | 65-74       | 54.9       | 53.3       | 52.0       |
|                                            | 75-84       | 61.2       | 59.4       | 57.1       |
|                                            | ≥85         | 72.5       | 69.7       | 67.1       |

|                                               |       |      |      |      |
|-----------------------------------------------|-------|------|------|------|
| Race                                          |       |      |      |      |
| White                                         | 65-74 | 85.6 | 85.3 | 83.5 |
|                                               | 75-84 | 88.2 | 87.0 | 85.8 |
|                                               | ≥85   | 87.4 | 87.6 | 86.5 |
| Black                                         | 65-74 | 8.2  | 8.9  | 8.6  |
|                                               | 75-84 | 7.2  | 7.1  | 7.6  |
|                                               | ≥85   | 8.0  | 7.4  | 7.0  |
| Other                                         | 65-74 | 6.2  | 5.8  | 7.9  |
|                                               | 75-84 | 4.6  | 5.8  | 6.6  |
|                                               | ≥85   | 4.6  | 5.0  | 6.4  |
| Enrollment in Medicare Advantage, %           |       |      |      |      |
|                                               | 65-74 | 3.0  | 5.0  | 3.0  |
|                                               | 75-84 | 2.1  | 4.0  | 1.9  |
|                                               | ≥85   | 1.7  | 3.3  | 1.5  |
| Dual eligible, %                              |       |      |      |      |
|                                               | 65-74 | 11.0 | 12.0 | 11.5 |
|                                               | 75-84 | 13.1 | 14.0 | 14.7 |
|                                               | ≥85   | 21.2 | 18.0 | 17.0 |
| <b>Comorbidity (per 100,000 person-years)</b> |       |      |      |      |
| History of heart failure                      |       |      |      |      |

|                                       |       |        |        |        |
|---------------------------------------|-------|--------|--------|--------|
|                                       | 65-74 | 1,337  | 1,395  | 1,093  |
|                                       | 75-84 | 3,062  | 2,934  | 2,446  |
|                                       | ≥85   | 6,395  | 6,268  | 5,209  |
| History of myocardial infarction      |       |        |        |        |
|                                       | 65-74 | 308    | 281    | 229    |
|                                       | 75-84 | 602    | 529    | 451    |
|                                       | ≥85   | 952    | 991    | 850    |
| Hypertension                          |       |        |        |        |
|                                       | 65-74 | 6,943  | 8,190  | 7,313  |
|                                       | 75-84 | 12,932 | 14,946 | 14,433 |
|                                       | ≥85   | 19,372 | 23,461 | 23,662 |
| Stroke                                |       |        |        |        |
|                                       | 65-74 | 238    | 196    | 162    |
|                                       | 75-84 | 578    | 438    | 380    |
|                                       | ≥85   | 1,036  | 838    | 692    |
| Chronic obstructive pulmonary disease |       |        |        |        |
|                                       | 65-74 | 3,041  | 3,143  | 2,309  |
|                                       | 75-84 | 5,594  | 5,671  | 4,369  |
|                                       | ≥85   | 7,430  | 7,949  | 5,985  |
| Chronic atherosclerosis               |       |        |        |        |
|                                       | 65-74 | 4,213  | 4,317  | 3,105  |
|                                       | 75-84 | 8,339  | 8,308  | 6,620  |
|                                       | ≥85   | 12,782 | 12,748 | 10,491 |
| Pneumonia                             |       |        |        |        |

|                       |       |       |       |       |
|-----------------------|-------|-------|-------|-------|
|                       | 65-74 | 1,026 | 1,181 | 1,269 |
|                       | 75-84 | 2,295 | 2,476 | 2,719 |
|                       | ≥85   | 4,887 | 5,260 | 5,561 |
| Trauma, past year     |       |       |       |       |
|                       | 65-74 | 756   | 939   | 646   |
|                       | 75-84 | 2,008 | 2,278 | 1,640 |
|                       | ≥85   | 5,166 | 5,638 | 4,129 |
| Chronic liver disease |       |       |       |       |
|                       | 65-74 | 223   | 247   | 280   |
|                       | 75-84 | 254   | 270   | 297   |
|                       | ≥85   | 191   | 208   | 233   |
| Asthma                |       |       |       |       |
|                       | 65-74 | 379   | 548   | 509   |
|                       | 75-84 | 550   | 750   | 697   |
|                       | ≥85   | 693   | 931   | 886   |
| Cancer                |       |       |       |       |
|                       | 65-74 | 1,779 | 1,652 | 1,373 |
|                       | 75-84 | 3,089 | 2,820 | 2,468 |
|                       | ≥85   | 3,962 | 3,626 | 3,083 |
| Diabetes              |       |       |       |       |
|                       | 65-74 | 3,664 | 4,239 | 3,753 |
|                       | 75-84 | 5,749 | 6,324 | 6,202 |

$\geq 85$

6,465

7,326

7,419

---



**Table S2.** Medicare Fee-for-Service Population 1999, 2006, and 2013 – Demographic Features and Comorbidities by Race-Sex Groups.

| Category                                   | Race-Sex     | 1999       | 2006       | 2013       |
|--------------------------------------------|--------------|------------|------------|------------|
| <b>Medicare Fee-for-Service population</b> |              |            |            |            |
| Total number of beneficiaries              |              |            |            |            |
|                                            | Female White | 14,139,724 | 14,729,816 | 14,161,114 |
|                                            | Male White   | 9,759,781  | 10,946,340 | 11,341,327 |
|                                            | Female Black | 1,340,883  | 1,467,794  | 1,432,634  |
|                                            | Male Black   | 810,847    | 938,569    | 1,006,686  |
|                                            | Female Other | 889,924    | 968,465    | 1,183,760  |
|                                            | Male Other   | 610,980    | 737,710    | 1,022,713  |
| Person-years of Medicare enrollment        |              |            |            |            |
|                                            | Female White | 13,456,244 | 13,927,194 | 13,577,707 |
|                                            | Male White   | 9,234,442  | 10,320,264 | 10,859,789 |
|                                            | Female Black | 1,264,888  | 1,354,976  | 1,351,270  |
|                                            | Male Black   | 757,149    | 864,185    | 947,932    |
|                                            | Female Other | 854,107    | 908,129    | 1,125,983  |
|                                            | Male Other   | 580,861    | 688,055    | 972,025    |
| <b>Demographics</b>                        |              |            |            |            |
| Mean age, year, standard deviation         |              |            |            |            |
|                                            | Female White | 76.2 (7.7) | 76.2 (8.0) | 75.7 (8.4) |
|                                            | Male White   | 74.2 (6.8) | 74.3 (7.1) | 74.0 (7.4) |
|                                            | Female Black | 75.8 (8.1) | 75.4 (8.2) | 75.0 (8.4) |

|  |              |            |            |            |
|--|--------------|------------|------------|------------|
|  | Male Black   | 73.8 (7.2) | 73.5 (7.2) | 73.1 (7.3) |
|  | Female Other | 74.9 (7.8) | 75.7 (8.0) | 74.9 (8.4) |
|  | Male Other   | 73.5 (7.0) | 74.1 (7.3) | 72.8 (7.5) |

Dual eligible, %

|  |              |      |      |      |
|--|--------------|------|------|------|
|  | Female White | 11.9 | 11.9 | 11.5 |
|  | Male White   | 5.8  | 6.4  | 6.6  |
|  | Female Black | 39.9 | 37.0 | 32.9 |
|  | Male Black   | 21.9 | 21.7 | 21.0 |
|  | Female Other | 46.1 | 54.2 | 48.9 |
|  | Male Other   | 37.5 | 41.2 | 33.5 |

Enrollment in Medicare Advantage, %

|  |              |     |     |     |
|--|--------------|-----|-----|-----|
|  | Female White | 2.3 | 3.9 | 2.0 |
|  | Male White   | 2.4 | 3.9 | 1.9 |
|  | Female Black | 3.7 | 8.2 | 5.1 |
|  | Male Black   | 3.7 | 7.3 | 4.5 |
|  | Female Other | 3.0 | 7.3 | 5.6 |
|  | Male Other   | 3.6 | 7.4 | 5.3 |

**Comorbidity (per 100,000 person-years)\***

History of heart failure

|  |              |       |       |       |
|--|--------------|-------|-------|-------|
|  | Female White | 2,478 | 2,457 | 1,976 |
|  | Male White   | 2,543 | 2,521 | 2,035 |
|  | Female Black | 3,734 | 3,876 | 3,260 |
|  | Male Black   | 3,321 | 3,534 | 2,950 |
|  | Female Other | 1,874 | 2,008 | 1,419 |

|                                  |              |        |        |        |
|----------------------------------|--------------|--------|--------|--------|
|                                  | Male Other   | 1,845  | 1,982  | 1,364  |
| History of myocardial infarction |              |        |        |        |
|                                  | Female White | 432    | 409    | 336    |
|                                  | Male White   | 591    | 520    | 424    |
|                                  | Female Black | 466    | 517    | 489    |
|                                  | Male Black   | 520    | 548    | 495    |
|                                  | Female Other | 313    | 366    | 264    |
|                                  | Male Other   | 438    | 439    | 322    |
| Chronic atherosclerosis          |              |        |        |        |
|                                  | Female White | 5,795  | 5,642  | 4,152  |
|                                  | Male White   | 8,450  | 8,655  | 6,709  |
|                                  | Female Black | 6,168  | 6,360  | 4,889  |
|                                  | Male Black   | 6,280  | 6,821  | 5,488  |
|                                  | Female Other | 4,134  | 4,535  | 2,885  |
|                                  | Male Other   | 5,077  | 5,855  | 4,052  |
| Hypertension                     |              |        |        |        |
|                                  | Female White | 10,976 | 13,058 | 12,070 |
|                                  | Male White   | 9,653  | 11,600 | 11,200 |
|                                  | Female Black | 14,487 | 15,771 | 14,580 |
|                                  | Male Black   | 12,335 | 13,358 | 12,913 |
|                                  | Female Other | 8,183  | 10,953 | 8,882  |
|                                  | Male Other   | 7,221  | 9,410  | 7,919  |
| Stroke                           |              |        |        |        |
|                                  | Female White | 420    | 334    | 278    |

|              |     |     |     |
|--------------|-----|-----|-----|
| Male White   | 442 | 340 | 285 |
| Female Black | 791 | 661 | 523 |
| Male Black   | 747 | 651 | 536 |
| Female Other | 362 | 327 | 236 |
| Male Other   | 419 | 360 | 250 |

Chronic obstructive pulmonary disease

|              |       |       |       |
|--------------|-------|-------|-------|
| Female White | 3,957 | 4,349 | 3,433 |
| Male White   | 5,577 | 5,312 | 3,684 |
| Female Black | 3,178 | 3,886 | 3,234 |
| Male Black   | 5,357 | 5,392 | 3,723 |
| Female Other | 2,307 | 2,689 | 1,677 |
| Male Other   | 3,423 | 3,600 | 2,094 |

Pneumonia

|              |       |       |       |
|--------------|-------|-------|-------|
| Female White | 1,755 | 2,010 | 2,179 |
| Male White   | 2,173 | 2,289 | 2,405 |
| Female Black | 2,137 | 2,461 | 2,538 |
| Male Black   | 2,685 | 2,881 | 2,851 |
| Female Other | 1,423 | 1,783 | 1,717 |
| Male Other   | 1,755 | 2,067 | 1,927 |

Trauma, past year

|              |       |       |       |
|--------------|-------|-------|-------|
| Female White | 2,084 | 2,397 | 1,660 |
| Male White   | 1,411 | 1,681 | 1,288 |
| Female Black | 1,227 | 1,462 | 959   |
| Male Black   | 1,116 | 1,379 | 967   |

|                       |              |       |       |       |
|-----------------------|--------------|-------|-------|-------|
|                       | Female Other | 1,308 | 1,720 | 994   |
|                       | Male Other   | 991   | 1,301 | 810   |
| Chronic liver disease |              |       |       |       |
|                       | Female White | 185   | 203   | 225   |
|                       | Male White   | 277   | 279   | 312   |
|                       | Female Black | 203   | 238   | 270   |
|                       | Male Black   | 339   | 422   | 501   |
|                       | Female Other | 265   | 350   | 328   |
|                       | Male Other   | 398   | 437   | 391   |
| Asthma                |              |       |       |       |
|                       | Female White | 558   | 805   | 776   |
|                       | Male White   | 307   | 407   | 361   |
|                       | Female Black | 865   | 1,270 | 1,177 |
|                       | Male Black   | 398   | 513   | 460   |
|                       | Female Other | 599   | 911   | 785   |
|                       | Male Other   | 358   | 467   | 378   |
| Cancer                |              |       |       |       |
|                       | Female White | 2,135 | 2,002 | 1,694 |
|                       | Male White   | 3,052 | 2,698 | 2,219 |
|                       | Female Black | 2,492 | 2,448 | 2,188 |
|                       | Male Black   | 3,947 | 3,561 | 2,872 |
|                       | Female Other | 1,400 | 1,533 | 1,180 |
|                       | Male Other   | 1,992 | 2,005 | 1,502 |
| Diabetes              |              |       |       |       |

|              |       |       |       |
|--------------|-------|-------|-------|
| Female White | 4,192 | 4,685 | 4,358 |
| Male White   | 4,815 | 5,408 | 5,081 |
| Female Black | 8,395 | 9,418 | 8,496 |
| Male Black   | 6,759 | 7,969 | 7,453 |
| Female Other | 5,007 | 6,244 | 5,085 |
| Male Other   | 4,942 | 5,960 | 4,874 |

---

**Table S3.** Medicare Fee-for-Service Population 1999, 2006, and 2013 – Hospitalizations and Outcomes by Age Groups.

| <b>Category</b>                                   | <b>Age (years)</b> | <b>1999</b> | <b>2006</b> | <b>2013</b> |
|---------------------------------------------------|--------------------|-------------|-------------|-------------|
| <b>Mortality (%)</b>                              |                    |             |             |             |
| All death                                         |                    |             |             |             |
|                                                   | 65-74              | 2.7         | 2.2         | 2.0         |
|                                                   | 75-84              | 6.2         | 5.5         | 5.3         |
|                                                   | ≥85                | 15.2        | 14.2        | 14.1        |
| In-hospital death                                 |                    |             |             |             |
|                                                   | 65-74              | 0.6         | 0.4         | 0.3         |
|                                                   | 75-84              | 1.5         | 1.1         | 0.8         |
|                                                   | ≥85                | 3.8         | 2.7         | 2.1         |
| 30 days from admission                            |                    |             |             |             |
|                                                   | 65-74              | 0.9         | 0.8         | 0.7         |
|                                                   | 75-84              | 2.4         | 2.0         | 1.9         |
|                                                   | ≥85                | 6.8         | 5.9         | 5.4         |
| 1 year from admission                             |                    |             |             |             |
|                                                   | 65-74              | 2.0         | 1.7         | 1.5         |
|                                                   | 75-84              | 5.1         | 4.2         | 3.9         |
|                                                   | ≥85                | 13.7        | 12.1        | 11.1        |
| <b>Hospitalization (per 100,000 person-years)</b> |                    |             |             |             |
| ≥1 hospitalization                                |                    |             |             |             |
|                                                   | 65-74              | 14,549      | 13,941      | 11,506      |

|                                                   |       |        |        |        |
|---------------------------------------------------|-------|--------|--------|--------|
|                                                   | 75-84 | 25,952 | 24,137 | 20,879 |
|                                                   | ≥85   | 41,347 | 38,946 | 34,248 |
| <b>Total hospitalizations</b>                     |       |        |        |        |
|                                                   | 65-74 | 23,475 | 22,445 | 17,836 |
|                                                   | 75-84 | 42,325 | 39,199 | 32,513 |
|                                                   | ≥85   | 66,460 | 63,396 | 53,084 |
| <b>Hospitalizations for major surgical care</b>   |       |        |        |        |
|                                                   | 65-74 | 3,236  | 3,171  | 2,785  |
|                                                   | 75-84 | 4,554  | 4,291  | 3,811  |
|                                                   | ≥85   | 3,946  | 3,580  | 2,907  |
| <b>Discharge status</b>                           |       |        |        |        |
| <b>Transferred to another acute care hospital</b> |       |        |        |        |
|                                                   | 65-74 | 895    | 562    | 374    |
|                                                   | 75-84 | 1,419  | 871    | 629    |
|                                                   | ≥85   | 1,348  | 870    | 653    |
| <b>SNF/ICF</b>                                    |       |        |        |        |
|                                                   | 65-74 | 2,452  | 2,701  | 2,688  |
|                                                   | 75-84 | 8,295  | 8,265  | 7,704  |
|                                                   | ≥85   | 23,726 | 22,848 | 19,515 |
| <b>Home</b>                                       |       |        |        |        |
|                                                   | 65-74 | 15,842 | 13,829 | 9,705  |
|                                                   | 75-84 | 23,225 | 19,267 | 13,865 |
|                                                   | ≥85   | 24,720 | 20,162 | 14,372 |



Home with care

|       |       |       |       |
|-------|-------|-------|-------|
| 65-74 | 2,236 | 3,093 | 3,103 |
| 75-84 | 4,746 | 5,841 | 5,789 |
| ≥85   | 7,550 | 9,510 | 9,262 |

Hospice

|       |     |      |      |
|-------|-----|------|------|
| 65-74 | 24  | 282  | 334  |
| 75-84 | 52  | 714  | 982  |
| ≥85   | 106 | 1991 | 2996 |

Long-term care

|       |    |     |     |
|-------|----|-----|-----|
| 65-74 | -- | 211 | 227 |
| 75-84 | -- | 380 | 390 |
| ≥85   | -- | 586 | 548 |

Rehabilitation

|       |    |      |      |
|-------|----|------|------|
| 65-74 | -- | 753  | 663  |
| 75-84 | -- | 1636 | 1472 |
| ≥85   | -- | 2327 | 2153 |

**Adjusted Medicare inpatient expenditure  
per beneficiary (\$)**

|       |       |       |       |
|-------|-------|-------|-------|
| 65-74 | 2,375 | 2,389 | 2,007 |
| 75-84 | 3,982 | 3,933 | 3,417 |
| ≥85   | 5,285 | 5,343 | 4,802 |

**Last 1 month of life**

Adjusted Medicare inpatient expenditure per

|                                                              |       |        |        |        |
|--------------------------------------------------------------|-------|--------|--------|--------|
| beneficiary (\$)                                             |       |        |        |        |
|                                                              | 65-74 | 10,883 | 11,242 | 10,607 |
|                                                              | 75-84 | 9,745  | 9,267  | 9,228  |
|                                                              | ≥85   | 6,949  | 6,779  | 6,557  |
| Total mean length of stay (days)                             |       |        |        |        |
|                                                              | 65-74 | 18     | 18     | 15     |
|                                                              | 75-84 | 16     | 16     | 13     |
|                                                              | ≥85   | 13     | 12     | 10     |
| ≥1 hospitalization rate                                      |       |        |        |        |
|                                                              | 65-74 | 37.7   | 37.5   | 34.8   |
|                                                              | 75-84 | 41.7   | 38.1   | 36.7   |
|                                                              | ≥85   | 43.9   | 40.6   | 37.1   |
| Total hospitalization rate                                   |       |        |        |        |
|                                                              | 65-74 | 64.4   | 66.3   | 59.2   |
|                                                              | 75-84 | 67.3   | 62.9   | 59.2   |
|                                                              | ≥85   | 65.3   | 61.9   | 54.3   |
| <b>Last 3 months of life</b>                                 |       |        |        |        |
| Adjusted Medicare inpatient expenditure per beneficiary (\$) |       |        |        |        |
|                                                              | 65-74 | 14,919 | 16,079 | 14,617 |
|                                                              | 75-84 | 13,324 | 13,069 | 12,503 |
|                                                              | ≥85   | 9,609  | 9,665  | 8,868  |
| Total mean length of stay (days)                             |       |        |        |        |
|                                                              | 65-74 | 19     | 19     | 17     |

|                                                              |       |        |        |        |
|--------------------------------------------------------------|-------|--------|--------|--------|
|                                                              | 75-84 | 17     | 17     | 14     |
|                                                              | ≥85   | 14     | 13     | 11     |
| ≥1 hospitalization rate                                      |       |        |        |        |
|                                                              | 65-74 | 52.4   | 53.8   | 47.5   |
|                                                              | 75-84 | 57.6   | 53.6   | 49.5   |
|                                                              | ≥85   | 60.1   | 56.8   | 49.7   |
| Total hospitalization rate                                   |       |        |        |        |
|                                                              | 65-74 | 100.3  | 107.1  | 90.3   |
|                                                              | 75-84 | 102.6  | 98.0   | 87.7   |
|                                                              | ≥85   | 96.8   | 94.5   | 78.5   |
| <b>Last 6 months of life</b>                                 |       |        |        |        |
| Adjusted Medicare inpatient expenditure per beneficiary (\$) |       |        |        |        |
|                                                              | 65-74 | 18,548 | 20,435 | 17,360 |
|                                                              | 75-84 | 16,430 | 16,251 | 14,543 |
|                                                              | ≥85   | 11,781 | 11,991 | 10,288 |
| Total mean length of stay (days)                             |       |        |        |        |
|                                                              | 65-74 | 19     | 20     | 17     |
|                                                              | 75-84 | 17     | 17     | 15     |
|                                                              | ≥85   | 14     | 14     | 12     |
| ≥1 hospitalization rate                                      |       |        |        |        |
|                                                              | 65-74 | 65.4   | 67.9   | 55.5   |
|                                                              | 75-84 | 71.2   | 66.7   | 57.1   |
|                                                              | ≥85   | 73.2   | 70.0   | 57.3   |

Total hospitalization rate

|       |       |       |       |
|-------|-------|-------|-------|
| 65-74 | 134.4 | 145.9 | 112.7 |
| 75-84 | 135.1 | 129.8 | 106.7 |
| ≥85   | 124.3 | 122.7 | 94.6  |

---

“--” indicates that data were not available for this variable.

SNF/ICF, Skilled nursing facility/Intermediate care facility

**Table S4.** Medicare Fee-for-Service Population 1999, 2006, and 2013 – Hospitalizations and Outcomes by Race-Sex Groups.

| <b>Category</b>        | <b>Race-Sex</b> | <b>1999</b> | <b>2006</b> | <b>2013</b> |
|------------------------|-----------------|-------------|-------------|-------------|
| <b>Mortality (%)</b>   |                 |             |             |             |
| All death              |                 |             |             |             |
|                        | Female White    | 5.3         | 4.9         | 4.7         |
|                        | Male White      | 6.0         | 5.2         | 4.9         |
|                        | Female Black    | 5.7         | 5.0         | 4.8         |
|                        | Male Black      | 7.2         | 6.1         | 5.4         |
|                        | Female Other    | 3.8         | 3.5         | 3.2         |
|                        | Male Other      | 4.6         | 4.1         | 3.4         |
| In-hospital death      |                 |             |             |             |
|                        | Female White    | 1.2         | 0.9         | 0.7         |
|                        | Male White      | 1.5         | 1.0         | 0.8         |
|                        | Female Black    | 1.5         | 1.1         | 0.8         |
|                        | Male Black      | 1.8         | 1.3         | 0.9         |
|                        | Female Other    | 0.9         | 0.7         | 0.5         |
|                        | Male Other      | 1.1         | 0.9         | 0.6         |
| 30 days from admission |                 |             |             |             |
|                        | Female White    | 2.0         | 1.7         | 1.6         |
|                        | Male White      | 2.4         | 2.0         | 1.8         |
|                        | Female Black    | 2.3         | 2.0         | 1.8         |
|                        | Male Black      | 2.7         | 2.2         | 1.9         |

|                                                   |              |        |        |        |
|---------------------------------------------------|--------------|--------|--------|--------|
|                                                   | Female Other | 1.3    | 1.3    | 1.1    |
|                                                   | Male Other   | 1.6    | 1.5    | 1.2    |
| 1 year from admission                             |              |        |        |        |
|                                                   | Female White | 4.2    | 3.7    | 3.4    |
|                                                   | Male White   | 5.0    | 4.2    | 3.7    |
|                                                   | Female Black | 5.0    | 4.5    | 4.0    |
|                                                   | Male Black   | 5.9    | 5.1    | 4.4    |
|                                                   | Female Other | 2.8    | 2.7    | 2.2    |
|                                                   | Male Other   | 3.5    | 3.2    | 2.5    |
| <b>Hospitalization (per 100,000 person-years)</b> |              |        |        |        |
| ≥1 hospitalization                                |              |        |        |        |
|                                                   | Female White | 21,722 | 20,831 | 17,775 |
|                                                   | Male White   | 22,328 | 20,679 | 17,278 |
|                                                   | Female Black | 23,728 | 23,185 | 19,812 |
|                                                   | Male Black   | 23,419 | 22,195 | 18,865 |
|                                                   | Female Other | 16,055 | 17,035 | 12,850 |
|                                                   | Male Other   | 16,567 | 16,552 | 12,365 |
| Total hospitalizations                            |              |        |        |        |
|                                                   | Female White | 34,397 | 33,045 | 27,004 |
|                                                   | Male White   | 36,429 | 33,508 | 26,807 |
|                                                   | Female Black | 41,771 | 41,477 | 34,046 |
|                                                   | Male Black   | 41,427 | 40,191 | 32,872 |
|                                                   | Female Other | 26,482 | 27,785 | 19,987 |

|            |        |        |        |
|------------|--------|--------|--------|
| Male Other | 27,974 | 27,587 | 19,613 |
|------------|--------|--------|--------|

Hospitalizations for major surgical care

|              |       |       |       |
|--------------|-------|-------|-------|
| Female White | 3,722 | 3,715 | 3,300 |
|--------------|-------|-------|-------|

|            |       |       |       |
|------------|-------|-------|-------|
| Male White | 4,285 | 3,847 | 3,254 |
|------------|-------|-------|-------|

|              |       |       |       |
|--------------|-------|-------|-------|
| Female Black | 2,915 | 2,866 | 2,470 |
|--------------|-------|-------|-------|

|            |       |       |       |
|------------|-------|-------|-------|
| Male Black | 2,868 | 2,656 | 2,271 |
|------------|-------|-------|-------|

|              |       |       |       |
|--------------|-------|-------|-------|
| Female Other | 2,321 | 2,387 | 1,820 |
|--------------|-------|-------|-------|

|            |       |       |       |
|------------|-------|-------|-------|
| Male Other | 2,490 | 2,379 | 1,893 |
|------------|-------|-------|-------|

**Discharge status**

Transferred to another acute care hospital

|              |     |     |     |
|--------------|-----|-----|-----|
| Female White | 998 | 618 | 432 |
|--------------|-----|-----|-----|

|            |       |     |     |
|------------|-------|-----|-----|
| Male White | 1,388 | 829 | 565 |
|------------|-------|-----|-----|

|              |       |     |     |
|--------------|-------|-----|-----|
| Female Black | 1,034 | 759 | 549 |
|--------------|-------|-----|-----|

|            |       |     |     |
|------------|-------|-----|-----|
| Male Black | 1,234 | 879 | 615 |
|------------|-------|-----|-----|

|              |     |     |     |
|--------------|-----|-----|-----|
| Female Other | 705 | 533 | 300 |
|--------------|-----|-----|-----|

|            |     |     |     |
|------------|-----|-----|-----|
| Male Other | 936 | 675 | 400 |
|------------|-----|-----|-----|

SNF/ICF

|              |       |       |       |
|--------------|-------|-------|-------|
| Female White | 8,161 | 8,358 | 7,481 |
|--------------|-------|-------|-------|

|            |       |       |       |
|------------|-------|-------|-------|
| Male White | 5,708 | 5,630 | 5,259 |
|------------|-------|-------|-------|

|              |       |       |       |
|--------------|-------|-------|-------|
| Female Black | 8,580 | 9,674 | 8,487 |
|--------------|-------|-------|-------|

|            |       |       |       |
|------------|-------|-------|-------|
| Male Black | 7,634 | 8,720 | 7,789 |
|------------|-------|-------|-------|

|              |       |       |       |
|--------------|-------|-------|-------|
| Female Other | 4,259 | 5,179 | 4,289 |
|--------------|-------|-------|-------|

|            |       |       |       |
|------------|-------|-------|-------|
| Male Other | 3,576 | 4,167 | 3,442 |
|------------|-------|-------|-------|

Home

|              |        |        |        |
|--------------|--------|--------|--------|
| Female White | 17,733 | 15,023 | 10,629 |
| Male White   | 21,794 | 18,324 | 12,733 |
| Female Black | 22,209 | 18,596 | 13,217 |
| Male Black   | 23,143 | 19,388 | 13,994 |
| Female Other | 16,277 | 14,447 | 9,072  |
| Male Other   | 18,119 | 15,557 | 9,793  |

Home with care

|              |       |       |       |
|--------------|-------|-------|-------|
| Female White | 3,798 | 4,909 | 4,819 |
| Male White   | 3,630 | 4,583 | 4,498 |
| Female Black | 5,286 | 7,191 | 7,061 |
| Male Black   | 4,386 | 5,592 | 5,474 |
| Female Other | 2,597 | 4,378 | 3,712 |
| Male Other   | 2,387 | 3,741 | 3,217 |

Hospice

|              |    |     |      |
|--------------|----|-----|------|
| Female White | 43 | 650 | 908  |
| Male White   | 48 | 667 | 885  |
| Female Black | 43 | 754 | 1084 |
| Male Black   | 51 | 759 | 1019 |
| Female Other | 22 | 416 | 546  |
| Male Other   | 22 | 414 | 535  |



Long-term care

|              |    |     |     |
|--------------|----|-----|-----|
| Female White | -- | 274 | 270 |
| Male White   | -- | 293 | 303 |
| Female Black | -- | 657 | 647 |
| Male Black   | -- | 704 | 705 |
| Female Other | -- | 339 | 308 |
| Male Other   | -- | 390 | 353 |

Rehabilitation

|              |    |      |      |
|--------------|----|------|------|
| Female White | -- | 1392 | 1169 |
| Male White   | -- | 1132 | 1069 |
| Female Black | -- | 1387 | 1273 |
| Male Black   | -- | 1255 | 1221 |
| Female Other | -- | 956  | 720  |
| Male Other   | -- | 776  | 659  |

**Adjusted Medicare inpatient expenditure  
per beneficiary (\$)**

|              |       |       |       |
|--------------|-------|-------|-------|
| Female White | 2,947 | 2,993 | 2,616 |
| Male White   | 3,671 | 3,551 | 2,925 |
| Female Black | 4,093 | 4,179 | 3,606 |
| Male Black   | 4,395 | 4,453 | 3,768 |
| Female Other | 2,546 | 2,923 | 2,297 |
| Male Other   | 3,077 | 3,321 | 2,518 |

**Last 1 month of life**

Adjusted Medicare inpatient expenditure per  
beneficiary (\$)

|              |        |        |        |
|--------------|--------|--------|--------|
| Female White | 7,905  | 7,580  | 7,251  |
| Male White   | 9,712  | 9,294  | 8,833  |
| Female Black | 11,831 | 11,611 | 11,076 |
| Male Black   | 11,542 | 11,807 | 11,366 |
| Female Other | 9,993  | 10,433 | 10,224 |
| Male Other   | 11,172 | 11,985 | 11,872 |

Total mean length of stay (days)

|              |    |    |    |
|--------------|----|----|----|
| Female White | 14 | 14 | 12 |
| Male White   | 15 | 15 | 13 |
| Female Black | 19 | 18 | 16 |
| Male Black   | 19 | 19 | 16 |
| Female Other | 17 | 17 | 14 |
| Male Other   | 17 | 18 | 15 |

≥1 hospitalization rate

|              |      |      |      |
|--------------|------|------|------|
| Female White | 40.5 | 37.8 | 35.1 |
| Male White   | 42.9 | 40.1 | 37.6 |
| Female Black | 43.1 | 41.1 | 39.0 |
| Male Black   | 40.5 | 39.4 | 38.0 |
| Female Other | 38.4 | 37.7 | 35.3 |
| Male Other   | 39.2 | 38.5 | 36.7 |

Total hospitalization rate

|              |      |      |      |
|--------------|------|------|------|
| Female White | 62.8 | 60.0 | 53.8 |
|--------------|------|------|------|

|              |      |      |      |
|--------------|------|------|------|
| Male White   | 68.7 | 65.6 | 59.1 |
| Female Black | 73.7 | 72.2 | 66.6 |
| Male Black   | 68.4 | 69.2 | 64.3 |
| Female Other | 62.5 | 62.7 | 56.2 |
| Male Other   | 64.2 | 64.7 | 59   |

**Last 3 months of life**

Adjusted Medicare inpatient expenditure per beneficiary (\$)

|              |        |        |        |
|--------------|--------|--------|--------|
| Female White | 10,910 | 10,788 | 9,877  |
| Male White   | 13,133 | 13,054 | 11,926 |
| Female Black | 16,889 | 17,152 | 15,695 |
| Male Black   | 16,172 | 17,311 | 15,977 |
| Female Other | 13,818 | 14,968 | 13,709 |
| Male Other   | 15,336 | 16,659 | 15,755 |

Total mean length of stay (days)

|              |    |    |    |
|--------------|----|----|----|
| Female White | 15 | 15 | 13 |
| Male White   | 16 | 16 | 14 |
| Female Black | 20 | 20 | 17 |
| Male Black   | 20 | 20 | 17 |
| Female Other | 18 | 18 | 15 |
| Male Other   | 19 | 19 | 16 |

$\geq 1$  hospitalization rate

|              |      |      |      |
|--------------|------|------|------|
| Female White | 56.0 | 53.4 | 47.6 |
| Male White   | 58.5 | 56.0 | 50.2 |
| Female Black | 61.5 | 60.2 | 54.4 |
| Male Black   | 57.1 | 56.7 | 52.5 |
| Female Other | 53.3 | 53.8 | 47.2 |
| Male Other   | 53.8 | 53.2 | 48.3 |

Total hospitalization rate

|              |       |       |       |
|--------------|-------|-------|-------|
| Female White | 95.3  | 93.4  | 79.3  |
| Male White   | 103.1 | 101.2 | 86.6  |
| Female Black | 117.5 | 119.5 | 103.5 |
| Male Black   | 107.6 | 112.5 | 99.1  |
| Female Other | 96.6  | 99.6  | 82.6  |
| Male Other   | 98.5  | 100.7 | 86.1  |

**Last 6 months of life**

Adjusted Medicare inpatient expenditure per beneficiary (\$)

|              |        |        |        |
|--------------|--------|--------|--------|
| Female White | 13,493 | 13,496 | 11,540 |
| Male White   | 16,097 | 16,239 | 13,903 |
| Female Black | 21,238 | 21,807 | 18,721 |
| Male Black   | 20,201 | 21,956 | 18,995 |
| Female Other | 17,169 | 18,847 | 15,983 |
| Male Other   | 18,833 | 20,818 | 18,260 |

Total mean length of stay (days)

|              |    |    |    |
|--------------|----|----|----|
| Female White | 16 | 15 | 13 |
|--------------|----|----|----|

|                            |              |       |       |       |
|----------------------------|--------------|-------|-------|-------|
|                            | Male White   | 16    | 16    | 14    |
|                            | Female Black | 21    | 21    | 18    |
|                            | Male Black   | 21    | 21    | 18    |
|                            | Female Other | 19    | 19    | 15    |
|                            | Male Other   | 19    | 20    | 16    |
| <br>                       |              |       |       |       |
| ≥1 hospitalization rate    |              |       |       |       |
|                            | Female White | 69.1  | 66.5  | 55.1  |
|                            | Male White   | 71.7  | 69.2  | 57.9  |
|                            | Female Black | 76.9  | 76    | 63.9  |
|                            | Male Black   | 71.4  | 71.6  | 61.2  |
|                            | Female Other | 66.0  | 67.0  | 54.3  |
|                            | Male Other   | 66.3  | 66.3  | 55.2  |
| <br>                       |              |       |       |       |
| Total hospitalization rate |              |       |       |       |
|                            | Female White | 124.9 | 123.5 | 96.6  |
|                            | Male White   | 134.2 | 133.0 | 105.2 |
|                            | Female Black | 159.1 | 163.0 | 129.6 |
|                            | Male Black   | 144.6 | 152.8 | 123.6 |
|                            | Female Other | 128.9 | 133.7 | 100.9 |
|                            | Male Other   | 130.1 | 134.7 | 104.6 |

---

“—” indicates that data was not available for this variable

SNF/ICF, Skilled nursing facility/Intermediate care facility
